# Supplementary material for: Effectiveness of S-1–Based Chemoradiotherapy in Patients 70 Years and Older With Esophageal Squamous Cell Carcinoma: A Randomized Clinical Trial
Source: PubMed Central journal article supplement (PMC10193185; doi:10.1001/jamanetworkopen.2023.12625), 2023-05-17
Supplement: jamanetwopen-e2312625-s001.pdf [file jamanetwopen-e2312625-s001.pdf]

1 **A Phase 3, Multicenter, Prospective Study of Tegafur-**  
2 **Gimeracil-Oteracil (S-1) with Simultaneous-integrated**  
3 **Boost Radiotherapy Versus Simultaneous-integrated**  
4 **Boost Radiotherapy Alone in Geriatric Esophageal**  
5 **Cancer/Esophagogastric Junction Cancer (3JECROG-**  
6 **P01)**

7

8 **Investigator’s Brochure**

9

|                     |                                                                                                                                                                                                                                                                                                                                                                                              |
|---------------------|----------------------------------------------------------------------------------------------------------------------------------------------------------------------------------------------------------------------------------------------------------------------------------------------------------------------------------------------------------------------------------------------|
| Principal Leads     | Xiao Zefen, Han Chun, Pang Qingsong and Zhao Yidian                                                                                                                                                                                                                                                                                                                                          |
| Cooperative Group   | Fan-Jingjinyi Multicenter Cooperative Group of Esophageal Tumors                                                                                                                                                                                                                                                                                                                             |
| Start Date          | March 2017                                                                                                                                                                                                                                                                                                                                                                                   |
| End Date            | April 2021                                                                                                                                                                                                                                                                                                                                                                                   |
| Leading Site        | Cancer Hospital, Chinese Academy of Medical Sciences                                                                                                                                                                                                                                                                                                                                         |
| Participating Sites | Tianjin Medical University Cancer Institute & Hospital<br>Anyang Cancer Hospital, Henan Province<br>Affiliated Hospital of Hebei Medical University<br>Tengzhou People’s Hospital, Shandong Province<br>Jiangsu Province Hospital<br>Fujian Cancer Hospital<br>First Affiliated Hospital of Zhengzhou University<br>First Affiliated Hospital of Xinxiang Medical University, Henan Province |

## 10 Study Overview

11

### 12 I. Study Rationale

#### 13 1. Lack of Therapeutic Guidelines for Geriatric Esophageal and Esophagogastric 14 Junction Cancer

15 No prospective clinical studies exist for geriatric esophageal and esophagogastric  
16 cancer that have a large sample size and a high-level evidence to support the U.S.  
17 National Comprehensive Cancer Network (NCCN), the European Society for Medical  
18 Oncology (ESMO), or the Chinese treatment guidelines, resulting in a lack of  
19 recommended treatment options. Clinically, the concurrent chemoradiotherapy regime for  
20 esophageal cancer in patients aged 70 years or younger is still widely used clinically with  
21 older patients. However, this regime does not address the clinical characteristics of older  
22 patients who may poorly tolerate the highly intensive treatment and who have a high  
23 incidence of concomitant complications. As a result, it is difficult to complete the  
24 treatment. Therefore, the need is urgent for a reasonable and effective treatment regime  
25 specifically for geriatric esophageal and esophagogastric cancer.

#### 26 2. High Mortality and Poor Therapeutic Outcomes for Esophageal Cancer

27 In China, esophagogastric cancer is a malignancy with a high incidence and poor  
28 prognosis, and its incidence and mortality account for 50% of the global rates of the  
29 disease<sup>[1]</sup>. Among patients with this cancer, those aged 70 years or older account for a  
30 high percentage of cases, between 30%–40%<sup>[2]</sup>, and this rate is still growing in our  
31 increasingly aging society. Because older patients may not tolerate surgery well and may  
32 have multiple comorbidities, radiation therapy may be better accepted and be an effective  
33 treatment for geriatric esophagogastric cancer. However, RTOG8501<sup>[3]</sup>, a prospective  
34 randomized study conducted in 1999 in the United States, found that radiotherapy alone  
35 was associated with a significantly lower survival rate than was concurrent  
36 chemoradiotherapy (the 5-year survival rates were 0% and 27%, respectively). Therefore,  
37 the NCCN treatment guidance recommends concurrent chemoradiotherapy. However,  
38 this study was based on standard radiotherapy, and no prospective studies have been  
39 reported for large patient cohorts since advanced radiotherapy techniques have been

40 adopted. Therefore, new research evidence, especially from studies of advanced  
41 radiotherapy techniques, is needed.

### 42 **3. A Radiation Dose for Both Prevention and Treatment Area Achieved with** 43 **Advanced Radiotherapy Techniques**

44 With advances in the three-dimensional conformal radiation therapy (including 3D  
45 conformal radiation therapy [CRT] and inverse intensity-modulated radiation therapy  
46 [IMRT]), a Phase 2 clinical study of radical simultaneous-integrated boost (SIB)-IMRT  
47 with concurrent chemotherapy for esophageal cancer used a similar radiation dose to that  
48 used in the high-dose group in RTOG 94-05<sup>[4]</sup> and showed a mean survival rate of 23  
49 months and a 3-year overall survival rate of 44.4%, a significant increase as compared to  
50 standard radiotherapy. This result supports the potential efficacy of SIB. However,  
51 whether SIB-IMRT can clinically gain wide application largely depends on its safety, and  
52 the challenging complications of SIB with concurrent chemotherapy, such as esophageal  
53 perforation, bleeding, and strictures, deserve close attention. Therefore, prospective Phase  
54 3 studies with large patient samples are needed before the technique can be used  
55 clinically. However, such clinical data based on large samples for SIB-IMRT is still  
56 lacking.

### 57 **4. Difficulties for Older Patients to Complete the Standard of Care Recommended** 58 **by NCCN Because of Toxic and Side Effects**

59 According to the U.S. NCCN and European ESMO treatment guidelines, the  
60 concurrent 5FU or capecitabine plus platinum-based two-drug chemoradiotherapy is  
61 recommended for patients with middle- to advanced-stage or inoperable esophageal  
62 cancer as the comprehensive treatment regime. However, the toxic and side effects of this  
63 regime are high. For example, the incidence ranges from 25% to 49% for Grade 3  
64 adverse reactions, 6% to 21% for Grade 4 adverse reactions, and 2% to 9% for Grade 5  
65 adverse reactions. No treatment guidelines exist that are dedicated to geriatric esophageal  
66 or esophagogastric junction cancer, except for some retrospective small-sample analyses.

67 For example, Tougeron et al. retrospectively analyzed the data from 109 patients  
68 with esophageal cancer aged 70 years or older who showed a clinical complete response  
69 (cCR) rate of 57.8% after receiving concurrent chemoradiotherapy consisting of cisplatin  
70 plus 5FU or cisplatin plus irinotecan, while multivariate analysis showed that concurrent

71 chemoradiotherapy, a radiation dose at 80% or more of the planned dose, and the  
72 Charlson score were all independent predictive factors for prognosis. However, the  
73 incidence of adverse reactions of Grade 3 or more was also high, reaching 23.8% and  
74 leading to 15.6% of the patients being unable to complete treatment. In this study, the  
75 authors also found that the Charlson score was significantly associated with the patients'  
76 tolerance of the treatment.<sup>[5]</sup>

77 Therefore, the treatment modality of two-drug chemotherapy with concurrent  
78 radiotherapy has not been applied widely in clinical settings for geriatric cancer,  
79 especially in China, because of poor patient tolerance and a low treatment completion  
80 rate<sup>[6,7]</sup>. Most hospitals use the conservative treatment regime of radiation only, although  
81 it is less effective than concurrent chemoradiotherapy. Therefore, will the advanced SIB-  
82 IMRT techniques combined with concurrent S-1 become a standard of care for geriatric  
83 esophageal and esophagogastric cancer? Insufficient evidence exists from prospective  
84 studies to answer this question.

## 85 **5. Comprehensive Geriatric Assessment**

86 Assessment of patients' quality of life (QoL) was largely ignored in prior prospective  
87 clinical studies in China; in addition, a Chinese-originated assessment system does not  
88 exist. Introduction of the internationally established standard evaluations to this study  
89 will enable a more humanized approach, with a focus on the observations of older  
90 patients' QoL. In fact, no published studies related to comprehensive geriatric assessment  
91 (CGA) have involved geriatric esophageal cancer.

92 CGA is a diagnostic process involving multi-lateral and multi-dimensional  
93 evaluation of an older patient's medical, mental, and physical functions, and on the basis  
94 of these results, a management plan is recommended to maintain or improve the functions  
95 to maximize the improvement or retention of QoL. CGA has been shown to be associated  
96 with a reduced incidence of treatment-related complications, improved QoL and physical  
97 functions, and reduced risk for hospitalization for some geriatric patients with tumors.<sup>[8]</sup>

98 Today it is important to choose a treatment regime by evaluating the potential for  
99 severe adverse reactions before the initiation of treatment. Corre *et al.* randomized 494  
100 patients aged 70 or older who had non-small cell lung cancer (NSCLC) into a CGA (test)

101 group and an age-PS score (control) group to receive the different treatment plans  
102 designed. Those patients with a favorable CGA score in the test group and those younger  
103 than age 75 and generally in good medical health in the control group were both treated  
104 with the carboplatin-based two-drug chemotherapy; those with a poor CGA score in the  
105 test group received only the best supportive care, and those of advanced age in the control  
106 group received only chemotherapy with docetaxel. The study concluded that CGA was  
107 not associated with the prognosis of geriatric NSCLC but found that CGA reduced the  
108 incidence of treatment-related toxic reactions.<sup>[9]</sup>

109 Therefore, this current study will perform the CGA on patients with geriatric  
110 esophageal cancer before and after treatment, including evaluation of social support,  
111 general condition, physical functions, nutritional status, mental health, and cognitive  
112 capability. The role of CGA in guiding the customized treatment also will be explored by  
113 analyzing the relationship of the CGA evaluation results with the patients' survival rate,  
114 seriousness of adverse reactions, and QoL.

115 In summary, this research project is planned to be a prospective, multicenter  
116 (facilitated by the applicant's identity as the Fan-Jingjinyi Cooperative Group of  
117 Esophageal Cancer) Phase 3 clinical study. This study is expected to generate high-level  
118 research evidence to provide crucial data and rationales for treatment solutions for  
119 geriatric esophageal/esophagogastric junction cancer.

## 120 **References**

- 121 [1] Chen W, Zheng R, Baade PD, et al. Cancer statistics in China, 2015[J]. CA  
122 Cancer J Clin, 2016,66(2):115-132. DOI: 10.3322/caac.21338.
- 123 [2] Wu M, Van't VP, Zhang ZF, et al. A large proportion of esophageal cancer cases  
124 and the incidence difference between regions are attributable to lifestyle risk factors in  
125 China[J]. Cancer Lett, 2011,308(2):189-196. DOI: 10.1016/j.canlet.2011.05.003.
- 126 [3] Cooper JS, Guo MD, Herskovic A, et al. Chemoradiotherapy of locally advanced  
127 esophageal cancer: long-term follow-up of a prospective randomized trial (RTOG 85-01).  
128 Radiation Therapy Oncology Group[J]. JAMA, 1999,281(17):1623-1627.
- 129 [4] Minsky BD, Pajak TF, Ginsberg RJ, et al. INT 0123 (Radiation Therapy  
130 Oncology Group 94-05) phase III trial of combined-modality therapy for esophageal

131 cancer: high-dose versus standard-dose radiation therapy[J]. J Clin Oncol,  
132 2002,20(5):1167-1174.

133 [5] Sasako M, Sakuramoto S, Katai H, et al. Five-year outcomes of a randomized  
134 phase III trial comparing adjuvant chemotherapy with S-1 versus surgery alone in stage II  
135 or III gastric cancer[J]. J Clin Oncol, 2011,29(33):4387-4393. DOI:  
136 10.1200/JCO.2011.36.5908.

137 [6] Fukushima M, Sakamoto K, Sakata M, et al. Gimeracil, a component of S-1, may  
138 enhance the antitumor activity of X-ray irradiation in human cancer xenograft models in  
139 vivo[J]. Oncol Rep, 2010,24(5):1307-1313.

140 [7] Huang J, Cao Y, Wu L, et al. S-1-based therapy versus 5-FU-based therapy in  
141 advanced gastric cancer: a meta-analysis[J]. Med Oncol, 2011,28(4):1004-1011. DOI:  
142 10.1007/s12032-010-9594-0.

143 [8] Cohen HJ, Feussner JR, Weinberger M, et al. A controlled trial of inpatient and  
144 outpatient geriatric evaluation and management[J]. N Engl J Med, 2002,346(12):905-912.  
145 DOI: 10.1056/NEJMsa010285.

146 [9] Corre R, Greillier L, Le CH, et al. Use of a Comprehensive Geriatric Assessment  
147 for the Management of Elderly Patients With Advanced Non-Small-Cell Lung Cancer:  
148 The Phase III Randomized ESOGIA-GFPC-GECP 08-02 Study[J]. J Clin Oncol,  
149 2016,34(13):1476-1483. DOI: 10.1200/JCO.2015.63.5839.

## 150 **Study Content**

### 151 **I. Study Objectives**

152 To provide high-level clinical evidence for treatment recommendations for geriatric  
153 esophageal cancer and esophagogastric junction cancer by comparing the overall survival  
154 between patients receiving S-1 with concurrent SIB-IMRT and SIB-IMRT alone in the  
155 phase 3 RCT.

### 156 **II. Study Protocol**

157 1. **Study Design:** This study is an open, multicenter Phase III clinical trial.  
158 Approximately 15 participating centers throughout China are involved. The  
159 technique of SIB is adopted in this study with a dose of 50.4Gy/2.14Gy/28f to  
160 planning target volume (PTV) and 59.92Gy/2.14Gy/28f to planning gross tumor

161 volume (PGTV). S-1 is given both concurrent with and after radiotherapy. Patients  
162 enrolled are stratified by disease stage and study site and assigned to either SIB +S-1  
163 group or SIB group using a 1:1 allocation ratio at randomization.

## 164 **2. Calculation of Sample Size and Method of Randomization:**

165 In the phase 3 study, we used a superiority trial design. The probability of the  
166 outcome event in this study's test population was approximately 35%. It was expected  
167 to take 4 years to enroll all subjects, with a follow-up period of 1 year after the last  
168 patient randomization. As such, a minimum of 134 patients was required for each  
169 group to achieve 80% power at the 5% level to detect a 10% increment in 1-year OS.  
170 Based on a 10% dropout rate, a final sample size of 150 for each arm was required.  
171 Eligible patients were randomized 1:1 to receive S-1-based definitive SIB-RT  
172 followed by consolidated chemotherapy (CRT-CT arm) or SIB-RT alone (RT arm) by  
173 a central randomization center (National Cancer Center/National Clinical Research  
174 Center for Cancer/Cancer Hospital, Beijing, China). Sequential assignment of patients  
175 was performed with R software using random block sizes of four with stratification of  
176 disease stage (IIa vs. IIb vs. III vs. IVa vs. IVb) and participating centers. A random  
177 assignment number was allocated to each patient and provided to the respective  
178 investigators via telephone. At the time point when 80% of the patients (240 patients)  
179 have been enrolled, the treatment competition and the cause of treatment discontinuity  
180 are intended to be analyzed. The enrollment of patients could proceed as the previous  
181 plan if the treatment completion rate is higher than 75%. In case of the treatment  
182 completion rate is lower than 75%, the cause of treatment discontinuity should be  
183 analyzed. If the incidence of treatment-related toxicities induced treatment  
184 discontinuity lower than 20%, the enrollment of patients would continue after  
185 changing the randomization ratio based on the incidence of incompleteness to make the  
186 number of patients completed radiotherapy in the RT arm was similar to those  
187 completed concurrent chemoradiotherapy in the CRT-CT arm.

188

## 189 **3. Study Subjects**

### 190 **1) Inclusion Criteria**

- 191 • Either gender aged  $\geq 70$  years;
- 192 • Naïve esophageal and esophagogastric cancer, with a clinical stage of T1bN +
- 193 M0-1a or T2-4N0-1M0-1a per AJCC/UICC 2002 (*i.e.*, Stages IIa–IVa);
- 194 • KPS score  $\geq 70$  or ECOG score of 0–1 and Charlson Comorbidity score  $\leq 3$ ;
- 195 • Squamous carcinoma or adenocarcinoma that is cytologically or pathologically
- 196 confirmed;
- 197 • Epicenter of the tumor in the esophagogastric junction adenocarcinoma no
- 198 more than 2 cm below the dentate line (*i.e.*, Siewert Types I/II);
- 199 • Clinical remittance of other malignant tumors (excluding curable non-
- 200 melanoma skin cancer and cervical carcinoma in situ), if any, in more than 5
- 201 years;
- 202 • Laboratory parameters met as follows:
- 203 Hemoglobin  $\geq 100$ g/L; white blood cells (WBCs)  $\geq 3.5 \times 10^9$ /L; neutrophils  $\geq$
- 204  $1.5 \times 10^9$ /L; platelets  $\geq 100 \times 10^9$ /L; creatinine  $\leq 1.0$ x upper normal limit (UNL);
- 205 blood urea nitrogen (BUN)  $\leq 1.0$ x UNL; alanine transaminase (ALT) and
- 206 aspartate aminotransferase (AST)  $\leq 1.5$ x UNL, alkaline phosphatase (ALP)  $\leq$
- 207  $1.5$ x UNL, and total bilirubin (TBIL)  $\leq 1.5$ x UNL;
- 208 • No history of allergy to 5-FU drugs; and
- 209 • No surgical, radiation, chemotherapy or any other anti-tumor therapies before
- 210 enrollment; no prior radiation at the site to be treated with radiotherapy.
- 211 **2) Exclusion Criteria**
- 212 • History of malignant tumors at other sites within 5 years before enrollment,
- 213 excluding curable non-melanoma skin cancer and cervical carcinoma in situ;
- 214 • Distant and hematogenous metastases beyond the supraclavicular lymph node
- 215 area at diagnosis, including metastases in multiple retroperitoneal lymph nodes,
- 216 bone, brain, lung, and liver and pleural fluid and ascites (with or without
- 217 cancerous cells detected in the ascites);
- 218 • Inability to receive 3D CRT or IMRT;
- 219 • Prior radiation at the site to be radiated;
- 220 • Allergy to 5-FU drugs;



- 221 • Apparent abnormalities in hematology or liver and renal functions at clinical  
222 examination;
  - 223 • Current obvious signs of perforation and deep ulcer of the esophagus (imaging  
224 confirmed);
  - 225 • Presence of fistula, perforation, and cachexy in the esophagus;
  - 226 • Current active infections such as active tuberculosis and hepatitis;
  - 227 • Other severe diseases, such as myocardial infarction and cerebral infarction within  
228 6 months or severe cardiac insufficiency and arrhythmia; mental disorders,  
229 including inability to cooperate; uncontrollable hypertension; and diabetes;
  - 230 • Participation in other clinical trials currently or within 4 weeks before enrollment;  
231 and
  - 232 • Other situations in which auditors find adequate reasons in registered studies to  
233 disqualify the patients, such as potential noncompliance with the protocol.
- 234 **3) Withdrawal and/or Termination Criteria:** Disease progression, voluntary  
235 patient withdrawal, or force majeure.
- 236 **4) Dropout Criteria:** Poor compliance such that the patients cannot complete the  
237 study according to the protocol; those who are lost during follow-up; and any  
238 other situation in which study staff deem it necessary to withdraw a subject.

#### 239 **4. Study Methods**

##### 240 **1) Primary Study Objectives**

241 To compare the overall survival between S-1 with concurrent SIB-IMRT (test  
242 group) and SIB-IMRT alone (control group).

##### 243 **2) Secondary Study Objectives**

244 A. Progression-free survival;

245 B. Incidence of adverse reactions.

##### 246 **3) Stipulations for Positioning Simulation, Prescribed Dose, and Area of** 247 **Radiation Therapy (Target Area)**

248 A. Requirements for CT Positioning Simulation of Radiotherapy

249 *CT Positioning Simulation:* Patients with cancer in the lower part of the  
250 esophagus or in the esophagogastric junction will fast for 3–4 hours before

251 CT positioning simulation to reduce the volume difference in radiation due  
252 to gastric filling and will have a semi-liquid diet of 200–300 ml (quantified  
253 each time) 15 minutes before each CT scan and radiation. This step is not  
254 prescribed for patients with cancer in the upper or middle segment of the  
255 esophagus. All patients will be scanned in the supine position, with the arms  
256 stretched on the sides of the body. Those patients with tumors in the  
257 cervical or the upper segment of the esophagus are recommended to use an  
258 immobilization mask for the head, neck, and shoulders, and those with  
259 tumors in the middle or lower segment of the esophagus or in the  
260 esophagogastric junction are immobilized with a body membrane. Contrast-  
261 enhanced venography shall be performed, with a slice thickness of 0.5 cm.  
262 Patients who are allergic to the contrast may be scanned without  
263 enhancement.

#### 264 B. Prescribed Dose

265 The SIB-IMRT technology will be used for patients in both groups, with 5  
266 radiations per week.

267 a) Squamous carcinoma in any segment of the esophagus, or the less  
268 common esophageal adenocarcinoma

269 95%PTV 50.4Gy/1.8Gy/28 times + SIB-PGTV 59.92Gy/2.14Gy/28  
270 times

271 b) Squamous carcinoma and adenocarcinoma in the esophagogastric  
272 junction (Siewert Types I/II)

273 95%PTV 45Gy/1.8Gy/25 times + SIB-PGTV 53.5Gy/2.14Gy/25 times

#### 274 C. Definition and Outlining of the Target Area (Same for Both Groups)

275 a) *GTV*: Outline the primary tumor using the combined imaging results of  
276 the thoracic CT, upper gastrointestinal radiography, gastroscopy and  
277 intracavitary ultrasound, PET-CT, and nuclear MRI.

278 b) *GTVnd*: Metastatic or highly suspected metastatic lymph nodes  
279 suggested by imaging results.

- 280 c) *CTV*: A margin of 0.6–0.8 cm on the left, right, anterior, and posterior  
281 sides (all 4 sides) of the GTV and GTVnd (adjusted for anatomical  
282 barriers if encountered in expansion) and a margin of 3–5 cm in the  
283 upper and lower directions of the GTV. Specifically,
- 284 • *Cervical/Upper Segment*: Level 1 or the lower cervical part, bilateral  
285 supraclavicular areas, 2, 3P, and Levels 4 and 7.
    - 286 ✓ *Upper limit*: 3–5 cm above the GTV or 1–1.5 cm above the  
287 metastatic lymph node area, whichever is higher.
    - 288 ✓ *Lower limit*: 3 cm below the GTV or 1–1.5 cm below the metastatic  
289 lymph node area, whichever is lower.
  - 290 • *Middle Segment*: Including 2, 3P, and Levels 4, 7, and 8. (*Note*: The  
291 supraclavicular area is not included.)
    - 292 ✓ *Upper limit*: 3–5 cm above the GTV or 1–1.5 cm above the  
293 metastatic lymph node area, whichever is higher.
    - 294 ✓ *Lower limit*: 3 cm below the GTV or 1– 1.5 cm below the metastatic  
295 lymph node area, whichever is lower.
  - 296 • *Lower Segment/Siewert Types I/II*: Including Level 8, the cardia, and the  
297 left stomach and excluding the lymphatic drainage area in the truncus  
298 celiac.
    - 299 ✓ *Upper limit*: 3–5 cm above the GTV or 1–1.5 cm above the  
300 metastatic lymph node area, whichever is higher.
    - 301 ✓ *Lower limit*: 3 cm below the GTV or 1–1.5 cm below the metastatic  
302 lymph node area, whichever is lower. If the tumor invades the cardia,  
303 fundus of the stomach, or stomach curvature, the CTV is expanded  
304 to a margin of 1–2 cm below the GTV along the stomach wall and 1  
305 cm along the stomach cavity.
- 306 d) *PGTV*: Including GTV + GTVnd, with a margin of 0.5 cm on the left,  
307 right, anterior, and posterior sides. If the upper/lower limit is GTV,  
308 *PGTV* is expanded to 1.0 cm above/below GTV. If the upper/lower limit  
309 is GTVnd, *PGTV* is expanded to 0.5 cm above/below GTVnd.

310  
311  
312  
313  
314  
315  
316  
317  
318  
319  
320  
321

e) PTV is expanded to 0.5 cm of CTV in the 3 dimensions.

*Note (see the figures below):* Outlining principles in the supraclavicular area: A. The outer area where no supraclavicular lymph node metastasis exists is the area within the internal carotid sheath. B. Expansion touches the outer edge of the jugular vein or the entire supraclavicular area dependent on the supraclavicular lymph node metastasis. See Figures A (Patient 1, without supraclavicular lymph node metastasis ), B1–B3 (Patient 2, with oligo supraclavicular lymph node metastasis attached with internal carotid vein) and C1–C2 (Patient 3, with multiple lymph node metastasis in supraclavicular fossa).

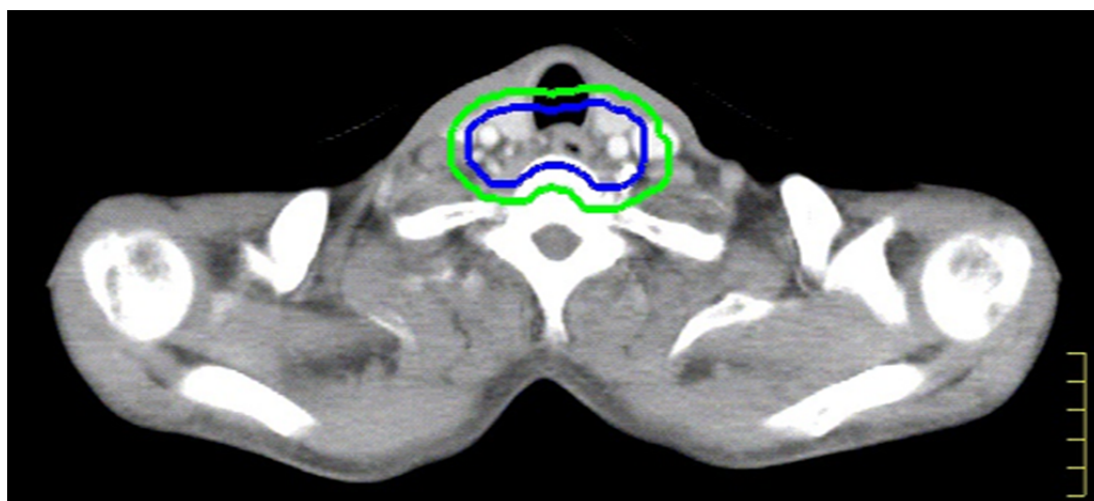

322  
323

Figure A. Prevention area in the upper segment of the esophagus.

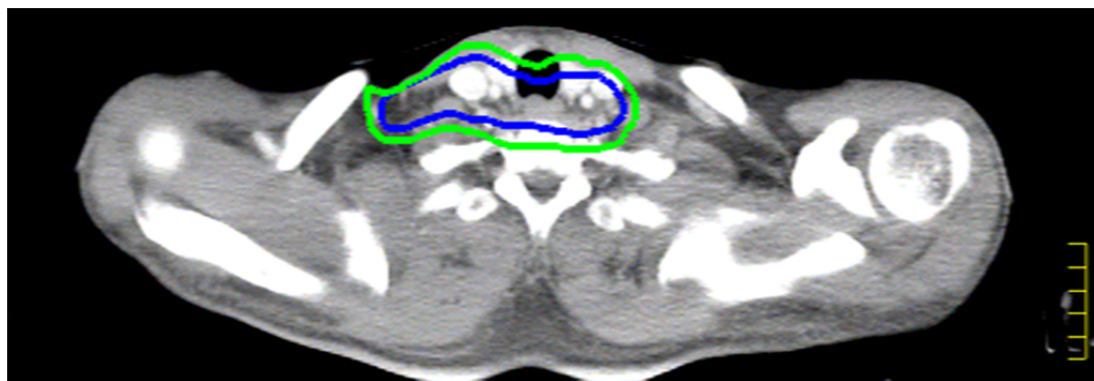

324

325  
326

Figure B1. Prevention area in esophageal cancer with supraclavicular lymph node metastasis.

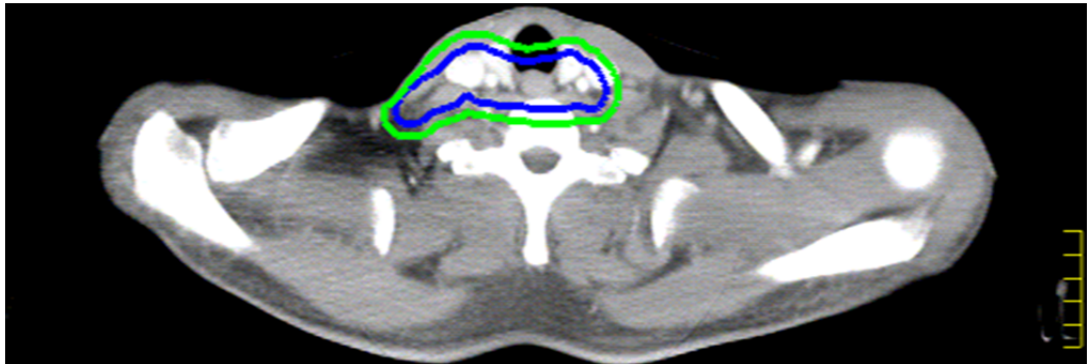

327  
328  
329

Figure B2. Prevention area in esophageal cancer with supraclavicular lymph node metastasis.

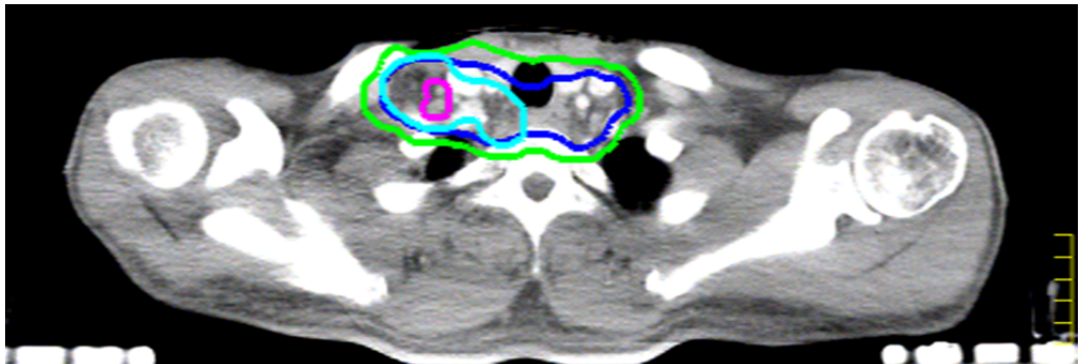

330  
331  
332

Figure B3. Prevention area in esophageal cancer with supraclavicular lymph node metastasis.

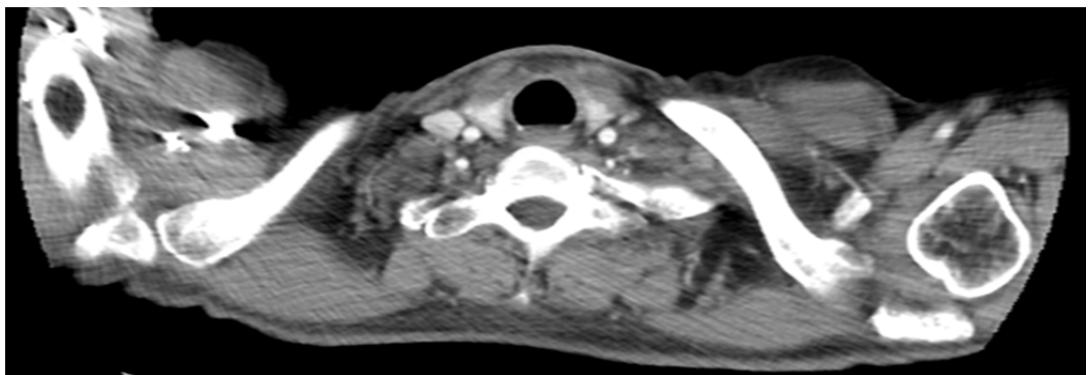

333  
334  
335

Figure C1. Prevention area in esophageal cancer with supraclavicular lymph node metastasis.

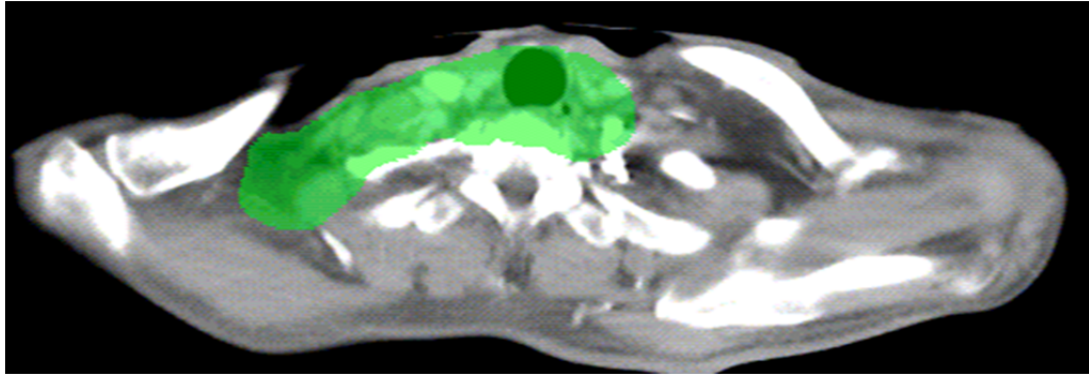

336  
337 Figure C2. Prevention area in esophageal cancer with supraclavicular lymph  
338 node metastasis.

339 D. Outlining of Normal Tissues and Organs and Evaluation

340 a) The lungs and heart; the spinal cord, spinal cord PRV, and bone marrow;  
341 and the stomach, liver, kidneys, and intestines (the small intestine and  
342 colon may be collectively outlined as the bowel) should be outlined for  
343 tumors in the lower segment and the esophagogastric junction.

344 b) The intestines and spinal cord should be outlined to 2 cm above/below  
345 the PTV, and the entire organ should be outlined for the lungs, heart,  
346 stomach, kidneys, and liver.

347 c) The spinal cord (*i.e.*, the vertebrae) should be outlined for 1 additional  
348 vertebra up and down for the PTV. Only vertebrae should be included,  
349 and the transverse processes, spinous process, and intervertebral discs  
350 are not included.

351 E. Dose Limits for Normal Tissues

- 352 • *Lungs*: V20 <28% , Dmean <15Gy;
- 353 • *Heart*: V30 <40% , V40 <30%;
- 354 • *Spinal cord PRV*: Dmax <45Gy;
- 355 • *Stomach*: V40 <40% , Dmax <55–60Gy;
- 356 • *Small intestines*: V40 <40% , Dmax <55Gy;
- 357 • *Kidneys*: V20 <30%;

358

- *Liver: V30 <30%.*

359

**4) Concurrent Chemotherapy Regime (Test Group)**

360

From the day radiotherapy begins, chemotherapy drugs will be given on the day of radiation and administered orally twice a day (BID) at half an hour after a meal, with an interval of 12 hours. No drugs are administered on days with no radiation. The specific oral dose is calculated based on the body surface area:

361

362

363

| Body surface area ( $m^2$ ) | Initial dose per administration |
|-----------------------------|---------------------------------|
| < 1.25                      | 40 mg                           |
| $\geq 1.25 \sim < 1.5$      | 50 mg                           |
| $\geq 1.5$                  | 60 mg                           |

364

365

For example, if a patient's body surface area is  $1.8m^2$ , S-1 is administered orally at 60 mg, BID, on the days of radiation.

366

367

**5) Adjuvant Chemotherapy Regime (Test Group):** After radiation therapy is completed, the patient rests for 3–4 weeks, and S-1 is initiated dependent on the hematology and liver and kidney functions (the inclusion criteria of this study must be met). The method of administration and dosage is as follows: The drug is taken for 14 consecutive days and then suspended for 7 days, with 21 days as 1 cycle, for a total of 4 cycles. Hematology will be monitored weekly, and liver and kidney functions tested every 4 weeks during drug administration.

368

369

370

371

372

373

374

375

**Outline of the Study Design**

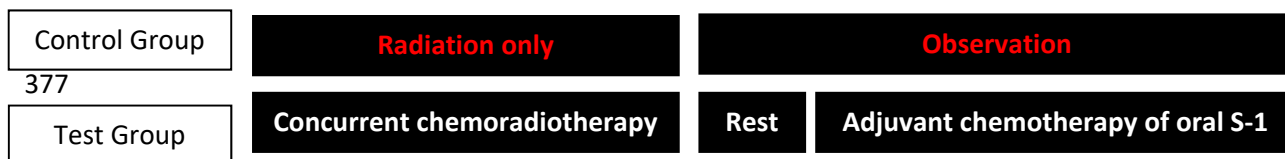

377

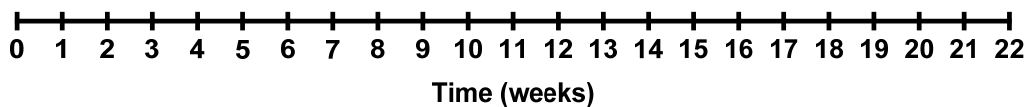

379

380

381

382 **6) In-Treatment Tests and Assessments**

383 **A. In-Treatment Tests**

384 **Weekly:** General condition (KPS score and body weight records); physical  
385 examination; grading of toxic and side reactions; and hematology, re-tested  
386 twice a week if abnormal.

387 **B. Test after Completion of Treatment**

388 Except for the weekly test items during treatment, the following tests will  
389 be performed: a CT scan of the neck, chest, and abdomen (with the same  
390 requirements as those for the pre-treatment CT), gastroscopy and  
391 intracavitary ultrasounds, CGA, and a comprehensive geriatric assessment  
392 and evaluation of the liver and kidney functions.

393 **7) Management of Adverse Events**

394 Adverse events during the trial will be graded based on CTCAE 4.0/RTOG,  
395 and any adverse events that occur during the trial will be recorded in the CRF.  
396 Serious adverse events (SAEs) shall be reported to the Ethics Committee of the  
397 hospital in writing within 24 hours, and the patients will be treated promptly. All  
398 patients with an SAE will be followed up with until the event is resolved.

399 According to the principles below, the drug dose will be reduced or even  
400 discontinued in case of an adverse event. The treatment details for dose reduction  
401 and drug discontinuation will be reflected in the clinical summary. During the trial,  
402 if an adverse event occurs, the following principles will be followed, and the  
403 details on the specific dose reduction and drug discontinuation of each patient will  
404 be recorded in the CRF and summarized in the clinical summary.

405 **Principles for Adverse Events and Dose Reduction/Discontinuation in Chemo-**  
406 **and Radiotherapy**

407 **A. Adverse Events in Chemoradiotherapy**

408 During this trial, attention will be given to the following conditions during  
409 chemoradiotherapy: gastrointestinal reactions, including nausea, vomiting,



410 abdominal pain, gastritis, dysphagia, reduced appetite, and fatigue; and  
411 myelosuppression, mainly reduced platelets.

## 412 **B. Principles for Dose Reduction/Discontinuation in Chemotherapy**

413 Any Grade 1/2 adverse reactions will be given symptomatic treatment, such  
414 as antiemetics, acid suppression, protection of gastric mucosa, and blood-  
415 generating medications administered orally or via intramuscular injection.

416 In case of Grade 4 WBC reduction, Grade 3 adverse reactions in the  
417 digestive tract, Grade 2 anemia and platelet reduction, and Grade 2 impaired  
418 liver and kidney functions, S-1 will be suspended and symptomatic treatment  
419 prescribed. If the adverse event improves to Grade 0–1 within 1 week of  
420 treatment, S-1 will be resumed at the original dose. If the adverse event has not  
421 improved to Grade 0-1 within this time or if new adverse events of Grade 2 or  
422 higher occur, the S-1 treatment and the radiation therapy will be terminated, if  
423 necessary. In the entire process, the doses of S-1 and radiation will not be  
424 adjusted unless new adverse reactions occur or the original adverse events  
425 worsen.

426 Other Grade 3 adverse reactions will be managed with the same principles  
427 for the corresponding Grade 2 adverse reactions.

428 For any Grade 4 adverse events such as reduction in WBCs or neutrophils,  
429 both S-1 and radiotherapy will be discontinued. Radiation may resume when the  
430 adverse reaction improves to Grade 0-1, but S-1 will not be resumed.

431 The principles for drug discontinuation during the adjuvant chemotherapy  
432 are the same those described as above.

## 433 **8) Follow-up and Efficacy Evaluation**

434 A. *Follow-up Assessments:* Follow-up assessments will include the following  
435 items:

- 436 • Survival status;
- 437 • Disease progression of the tumor;
- 438 • Local/regional lymph node progression;

- 439                   • Distant metastasis, including distant lymph node metastasis and  
440                   hematogenous metastasis;  
441                   • Other treatment received (e.g., chemotherapy, surgery, additional  
442                   radiation therapy);  
443                   • Food intake and QoL; and  
444                   • Late-onset reactions to radiotherapy.

445           B. *Efficacy Evaluation*: Short-term (within 1 month after radiotherapy)  
446           efficacy of radiation therapy of tumor response evaluation will be measured  
447           using CR + PR rate (evaluation criteria RECIST version 1.1 combined with  
448           barium meal imaging).

449           C. *Follow-up Times and Data Collection*: All patients will be followed up  
450           every 3 months within 2 years after the radiation therapy is completed, then  
451           every half a year, and then once a year after 5 years. The follow-ups shall  
452           include the following data collection:

- 453                   • Medical history, including whether the patients experienced cough, chest  
454                   tightness, fever, and dysphasia;  
455                   • Hematology, chemistry, and tumor marker examinations; and  
456                   • Enhanced CTs on the neck, chest, and abdomen; ultrasounds of the neck  
457                   and abdomen; esophagography and bone ECTs; and, if necessary, brain CTs  
458                   or MRIs and aspiration cytology.

459           Information from the follow-ups will be recorded in detail, including late-onset  
460           toxicity and recurrence, metastasis, and death.

## 461    **9) Data Management**

### 462    **A. Data Lock**

463           After the database has been established and confirmed to be correct, the raw  
464           data will be locked by the principal investigator, project leads, and statistical  
465           personnel. No changes will be made to the data after the lock. Any problems  
466           identified after the database is locked will be amended during the statistical  
467           analysis once they have been confirmed.

### 468    **B. Data Processing**

469 After the study data have been entered and the database is locked, the  
470 database will be handed over to the statistical personnel for analysis according  
471 to the statistical analysis plan. After this analysis is completed, the statistical  
472 personnel will write a statistical analysis report. The study personnel, statistical  
473 personnel, and sponsor will unblind the study for the second time, and the  
474 results will be handed to the principal investigator for the completion of the  
475 study report.

### 476 C. Data Sets

#### 477 a) Full Analysis Set

478 The full analysis set (FAS) is an ideal set of cases that includes the intent-  
479 to-treat (ITT) population, and it comprises all randomized patients, with  
480 the unreasonable cases excluded. The FAS in this study comprises all  
481 patients who have been assigned to treatment groups through  
482 randomization, who have received treatment per the protocol of this study,  
483 and who have had at least 1 baseline evaluation and 1 post-baseline  
484 evaluation.

485 For patients who have dropped out during the trial, their missing data at  
486 the post-dropout observation time points will be managed by carrying  
487 forward the corresponding last observation data (last observation carried  
488 forward, LOCF); for the missing data for the patients who have  
489 completed the trial, the corresponding non-missing data of the nearest  
490 time point will be carried forward. For patients who have dropped out  
491 after randomization and enrollment with no evaluable post-treatment data,  
492 the missing data will not be input and will be processed as is.

#### 493 b) Per-Protocol Set

494 The per-protocol set (PPS), also called *effective cases*, *effective samples*,  
495 or *evaluable case samples*, is a data set comprised of the subset of  
496 patients with adequate compliance with the protocol such that the data  
497 will show the treatment effect according to the scientific model on which  
498 the study is based. In this study, the PPS will comprise all randomized

499 and enrolled patients who adhered to the protocol, who have full baseline  
500 values for the primary indicators, who have good compliance, and who  
501 complete the trial according to the study protocol. The missing data will  
502 not be input and will be processed as is.

503 **c) Safety Analysis Set**

504 The safety analysis set comprises all subjects who have been randomized,  
505 received at least 1 treatment, and undergone at least 1 safety evaluation.

506 The compliance of the data sets above involves considerations such as  
507 treatment received, measurable primary indicators, and no major  
508 violation of the protocol.

509 **10) Statistical Analysis Plan**

510 **A. General Principle:** The statistical analysis will be conducted with the  
511 internationally accepted SPSS software, version 20.0. All statistical tests  
512 involved in this study will adopt the two-sided significance test, with  $p \leq$   
513 0.05 having statistical significance.

514 **B. Descriptive Statistics and Equilibrium Analysis of the Data**

515 The basic patient information in both groups, such as gender, age, cancer  
516 stage, and tumor length, will be analyzed with descriptive statistics, and the  
517 equilibrium of the inter-group distribution will be evaluated. The inter-group  
518 comparison of numeric variables, such as age and body weight, will be  
519 conducted with the  $t$  test if the data follow a normal distribution and with the  
520 Wilcoxon rank-sum test if otherwise. The inter-group comparison of variables  
521 such as gender and stage will be conducted with Pearson's chi-square test,  
522 Fisher's exact test, or the CMH test. The analysis will be based on the FAS  
523 data. The overall dropout rates and the dropout rates due to adverse events for  
524 the two patient groups will be compared with a chi-square test.

525 For continuous variables, a parametric test (*e.g.*,  $t$  test, variance analysis)  
526 will be used if the data follow a normal distribution, and a non-parametric test  
527 (*e.g.*, rank-sum test) will be used if the data are not normally distributed, If  
528 non-normally distributed data become normally distributed after data

529 transformation, a parametric test method may be used. For categorical  
530 variables, a chi-square test may be used for unordered data in a two-way R x  
531 C table, with the Fisher's exact test conducted when the number of cells with  
532 a theoretical frequency <5 exceeds 1/5 of the total number of cells. For  
533 ordered data in a one-way table, a rank-sum test will be used for analysis.

#### 534 **C. Analysis of Efficacy Endpoints**

535 Primary and secondary endpoints are evaluated in the intention-to-treat  
536 (ITT) population (all randomized patients). In case of the treatment completion  
537 rate is lower than 75%,  $\chi^2$  test is used to evaluate whether the missingness was  
538 at random or not at random. When the missingness is confirm as missing at  
539 random, for missingness imputation, weighted log-rank testing of the ITT  
540 population will be conducted to simulate the condition in which the  
541 randomization proportion between RT group and CRT-CT group was 1: 1,  
542 and survival analysis of the per-protocol (PP) population (randomized  
543 participants who completed treatment as planned) will be applied.

#### 544 **D. Analysis of Safety Endpoints**

545 The incidence of adverse events and side effects such as changes in  
546 laboratory results will be analyzed. Adverse events will be categorized as  
547 adverse reactions and unrelated adverse events. From a conservative  
548 perspective for this study, all adverse reactions will be determined to be  
549 "definitely related," "probably related," or "possibly related" to the study drug  
550 under investigation in the trial. Incidence of adverse events (or adverse  
551 reactions) = number of patients with at least 1 adverse event (or adverse  
552 reaction)/number of patients with safety.

#### 553 **E. Analysis of Dropout Rates**

554 The overall dropout rates and those due to adverse events for both groups  
555 will be analyzed and compared with a chi-square test/Fisher's exact test.

### 556 **11) Quality Control for the Clinical Trial**

557 A. During this study, a clinical monitor designated by the sponsor will visit the  
558 study hospitals regularly for on-site inspection to ensure that all contents of

559 the study protocol are strictly followed and that the study information is  
560 accurately recorded.

561 ● All staff involved in the study will be trained uniformly, and the training  
562 method and evaluation criteria will be recorded uniformly. The entire clinical  
563 trial will be conducted under the condition of strict blindness.

564 ● The investigators will complete the CRF according to the requirements by  
565 filling in each item truthfully, carefully, and in detail to ensure the form's  
566 accuracy and reliability.

567 ● Whether a laboratory test result is abnormal is determined by the testing  
568 facility's normal reference range.

569 ● All observations and findings in the clinical trial will be verified to ensure the  
570 reliability of the data and to ensure that all conclusions of the clinical trial are  
571 based on the raw data. Appropriate data management measures will be in  
572 place during the clinical trial and when the data are processed.

573 ● Potential dropouts will be actively managed with proper actions.

#### 574 B. Quality Control and Quality Assurance

575 ● Professional personnel designated by the leading project site will review the  
576 enrollment status, entry status of the electronic CRF, and quality of each site.  
577 Any problems identified will be promptly communicated.

578 ● Eligibility for the trial will be determined by each site, and the study patients  
579 will be informed of the benefits and risks of the treatment and the potential  
580 toxic and side effects. The patients must sign the informed consent form to  
581 participate. The patients will be assigned to treatments according to the  
582 randomization envelopes generated by the physician responsible for  
583 randomization at the leading site.

584 ● The chief physician of each site will be responsible for the ward inspection  
585 system. During the weekly ward inspection, the chief physician will listen to  
586 the medical history, read all information for each patient, modify the target  
587 area in person, and carry out the treatment plan according to the assignment.

588 ● A senior residential doctor or attending doctor will position the patients  
589 during CT simulation and outline the target areas, which will then be

590 modified by the chief physician, and the prescribed dose will be  
591 administered according to the study requirements.

592 ● A ward inspection system for the radiation therapy department provides the  
593 best quality control. Once the research project is established, the project lead  
594 will describe the requirements of and details for their department. The  
595 weekly ward inspection system will make certain that each newly enrolled  
596 patient is inspected during the ward inspection so that the radiation target  
597 area, radiotherapy plan, CRF entries, and electronic CRF entries are  
598 reviewed.

599 ● Each newly enrolled patient will be verified for radiotherapy before radiation  
600 begins, and the physicists will review information, such as the planned  
601 radiation dose. All responsibilities will be clearly defined to ensure that the  
602 treatment plans are executed without errors.
