# Supplementary material for: Effectiveness of S-1–Based Chemoradiotherapy in Patients 70 Years and Older With Esophageal Squamous Cell Carcinoma: A Randomized Clinical Trial
Source: PubMed Central journal article supplement (PMC10193185; doi:10.1001/jamanetworkopen.2023.12625), 2023-05-17
Supplement: jamanetwopen-e2312625-s002.pdf [file jamanetwopen-e2312625-s002.pdf]

## Supplemental Online Content

Wang X, Han W, Zhang W, et al; Jing-Jin-Ji Esophageal and Esophagogastric Cancer Radiotherapy Oncology Group (3JECROG). Effectiveness of S-1–based chemoradiotherapy in patients 70 years and older with esophageal squamous cell carcinoma: a randomized clinical trial. *JAMA Netw Open*. 2023;6(5):e2312625. doi:10.1001/jamanetworkopen.2023.12625

**eTable 1.** Causes of Treatment Discontinuity in RT and CRTCT Groups

**eTable 2.** Causes of Death in RT and CRTCT Groups

**eTable 3.** Baseline Characteristics of Patients Enrolled Before February 19, 2019

**eTable 4.** Baseline Characteristics of Patients Enrolled After February 19, 2019

**eTable 5.** Incidence of Severe Adverse Events (Grade 3-5)

**eFigure.** Overall Survival and Progression-Free Survival of Patients Who Completed Concurrent Chemotherapy With or Without Consolidated Chemotherapy

This supplemental material has been provided by the authors to give readers additional information about their work.

**eTable 1.** Causes of Treatment Discontinuity in RT and CRTCT Groups

| Causes                                                | RT arm     | CRTCT arm  | <i>P</i> value <sup>a</sup> |
|-------------------------------------------------------|------------|------------|-----------------------------|
|                                                       | No. (%)    | No. (%)    |                             |
| Refuse to complete treatment                          | 13 (39.4%) | 52 (53.1%) | 0.51                        |
| Adverse events                                        | 13 (39.4%) | 24 (24.5%) |                             |
| Comorbidity                                           | 5 (15.2%)  | 17 (17.3%) |                             |
| Died or disease progressed before treatment completed | 0 (0.0%)   | 1 (1.0%)   |                             |
| Outbreak of COVID-19                                  | 1 (3.0%)   | 2 (2.0%)   |                             |
| Recurrence before consolidated chemotherapy completed | 1 (3.0%)   | 2 (2.0%)   |                             |

<sup>a</sup>confirmed by Fisher's exact test.

**eTable 2.** Causes of Death in RT and CRTCT Groups

| Causes                  | RT arm     | CRTCT arm  |
|-------------------------|------------|------------|
|                         | No. (%)    | No. (%)    |
| Esophageal carcinoma    | 85 (84.2%) | 78 (75.0%) |
| Comorbidity             | 9 (8.9%)   | 17 (16.3%) |
| Complication            | 4 (4.0%)   | 5 (4.8%)   |
| Accidence               | 2 (2.0%)   | 2 (1.9%)   |
| Secondary primary tumor | 0 (0.0%)   | 1 (1.0%)   |
| Causes of unknown       | 1 (1.0%)   | 1 (1.0%)   |

**eTable 3.** Baseline Characteristics of Patients Enrolled Before February 19, 2019

| Characteristics                   |                 | RT               | CRT+CT           | $\chi^2$ | P value           |
|-----------------------------------|-----------------|------------------|------------------|----------|-------------------|
|                                   |                 | (N=113)          | (N=127)          |          |                   |
|                                   |                 | No. (%)          | No. (%)          |          |                   |
| Age                               | <80 years       | 86(76.1)         | 102(80.3)        | 0.62     | 0.43              |
|                                   | $\geq$ 80 years | 27(23.9)         | 25(19.7)         |          |                   |
|                                   | Median (IQR)    | 76.0 (73.0-79.0) | 75.0 (72.0-78.0) |          |                   |
| Sex                               | male            | 68(60.2)         | 89(70.1)         | 2.59     | 0.11              |
|                                   | female          | 45(39.8)         | 38(29.9)         |          |                   |
| ECOG performance score            | 0               | 5(4.4)           | 12(9.4)          | 2.29     | 0.13              |
|                                   | 1               | 108(95.6)        | 115(90.6)        |          |                   |
| Charlson comorbidity index        | 0               | 89(78.8)         | 88(69.3)         | 3.18     | 0.20              |
|                                   | 1               | 16(14.2)         | 29(22.8)         |          |                   |
|                                   | 2               | 8(7.1)           | 10(7.9)          |          |                   |
| Mini nutritional assessment score | <17.0           | 16(14.2)         | 25(19.7)         | 1.36     | 0.51              |
|                                   | 17.0-23.5       | 62(54.9)         | 67(52.8)         |          |                   |
|                                   | $\geq$ 24.0     | 35(31.0)         | 35(27.6)         |          |                   |
|                                   | Median (IQR)    | 22.0 (18.8-24.0) | 21.5 (17.0-24.0) |          |                   |
| Body mass index                   | <18.5           | 14(12.4)         | 17(13.4)         | 0.05     | 0.97              |
|                                   | 18.5-23.9       | 63(55.8)         | 70(55.1)         |          |                   |
|                                   | $\geq$ 24.0     | 36(31.9)         | 40(31.5)         |          |                   |
|                                   | Median (IQR)    | 22.8 (19.8-24.9) | 22.0 (20.3-24.5) |          |                   |
| Pretreatment dietary Intake       | general diet    | 22(19.5)         | 12(9.4)          | 7.50     | 0.06              |
|                                   | soft diet       | 33(29.2)         | 42(33.1)         |          |                   |
|                                   | fluid diet      | 56(49.6)         | 65(51.2)         |          |                   |
|                                   | aphagosis       | 2(1.8)           | 8(6.3)           |          |                   |
| Tobacco consumption               | no              | 68(60.2)         | 78(61.4)         | 0.04     | 0.84              |
|                                   | yes             | 45(39.8)         | 49(38.6)         |          |                   |
| Alcohol consumption               | no              | 97(85.8)         | 108(85.0)        | 0.03     | 0.86              |
|                                   | yes             | 16(14.2)         | 19(15.0)         |          |                   |
| Tumor location                    | upper third     | 34(30.1)         | 50(39.4)         | 2.66     | 0.27              |
|                                   | middle third    | 55(48.7)         | 50(39.4)         |          |                   |
|                                   | lower third     | 24(21.2)         | 27(21.3)         |          |                   |
| Length                            | <5.0cm          | 53(46.9)         | 41(32.3)         | 5.36     | 0.02              |
|                                   | $\geq$ 5.0cm    | 60(53.1)         | 86(67.7)         |          |                   |
|                                   | Median (IQR)    | 5.0 (3.9-6.0)    | 5.0 (4.0-7.0)    |          |                   |
| T stage                           | T1              | 4(3.5)           | 2(1.6)           | -        | 0.80 <sup>a</sup> |
|                                   | T2              | 11(9.7)          | 14(11.0)         |          |                   |
|                                   | T3              | 68(60.2)         | 79(62.2)         |          |                   |
|                                   | T4              | 30(26.5)         | 32(25.2)         |          |                   |
| N stage                           | N0              | 30(26.5)         | 38(29.9)         | 0.34     | 0.56              |
|                                   | N1              | 83(73.5)         | 89(70.1)         |          |                   |
| M stage                           | M0              | 99(87.6)         | 109(85.8)        | 1.21     | 0.55              |

|                         |              |            |           |          |      |
|-------------------------|--------------|------------|-----------|----------|------|
|                         | M1a          | 6(5.3)     | 11(8.7)   |          |      |
|                         | M1b          | 8(7.1)     | 7(5.5)    |          |      |
| TNM stage               | IIA          | 20(17.7)   | 27(21.3)  |          |      |
|                         | IIB          | 9(8.0)     | 11(8.7)   |          |      |
|                         | III          | 70(61.9)   | 71(55.9)  | 1.98     | 0.74 |
|                         | IVA          | 6(5.3)     | 11(8.7)   |          |      |
|                         | IVB          | 8(7.1)     | 7(5.5)    |          |      |
|                         | Radiotherapy | incomplete | 8(7.1)    | 14(11.0) | 1.12 |
| completed               |              | 105(92.9)  | 113(89.0) |          |      |
| Concurrent chemotherapy | incomplete   | -          | 34(26.8)  |          |      |
|                         | completed    | -          | 93(73.2)  | -        | -    |
| Adjuvant chemotherapy   | incomplete   | -          | 65(51.2)  |          |      |
|                         | completed    | -          | 62(48.8)  | -        | -    |

<sup>a</sup>confirmed by Fisher's exact test.

**eTable 4.** Baseline Characteristics of Patients Enrolled After February 19, 2019

| Characteristics                   |                 | RT               | CRT+CT           | $\chi^2$ | P value           |
|-----------------------------------|-----------------|------------------|------------------|----------|-------------------|
|                                   |                 | (N=33)           | (N=57)           |          |                   |
|                                   |                 | No. (%)          | No. (%)          |          |                   |
| Age                               | <80 years       | 27(81.8)         | 43(75.4)         | 0.49     | 0.48              |
|                                   | $\geq$ 80 years | 6(18.2)          | 14(24.6)         |          |                   |
|                                   | Median (IQR)    | 75.5 (73.0-78.8) | 76.0 (72.0-79.0) |          |                   |
| Sex                               | male            | 24(72.7)         | 39(68.4)         | 0.19     | 0.67              |
|                                   | female          | 9(27.3)          | 18(31.6)         |          |                   |
| ECOG performance score            | 0               | 4(12.1)          | 7(12.3)          | -        | 1.00 <sup>a</sup> |
|                                   | 1               | 29(87.9)         | 50(87.7)         |          |                   |
| Charlson comorbidity index        | 0               | 27(81.8)         | 35(61.4)         | 4.18     | 0.12              |
|                                   | 1               | 3(9.1)           | 13(22.8)         |          |                   |
|                                   | 2               | 3(9.1)           | 9(15.8)          |          |                   |
| Mini nutritional assessment score | <17.0           | 4(12.1)          | 8(14.0)          | 0.84     | 0.66              |
|                                   | 17.0-23.5       | 13(39.4)         | 27(47.4)         |          |                   |
|                                   | $\geq$ 24.0     | 16(48.5)         | 22(38.6)         |          |                   |
|                                   | Median (IQR)    | 23.3 (20.8-24.5) | 22.0 (19.8-25.8) |          |                   |
| Body mass index                   | <18.5           | 5(15.2)          | 9(15.8)          | 0.08     | 0.96              |
|                                   | 18.5-23.9       | 19(57.6)         | 34(59.6)         |          |                   |
|                                   | $\geq$ 24.0     | 9(27.3)          | 14(24.6)         |          |                   |
|                                   | Median (IQR)    | 22.1 (19.6-23.8) | 22.4 (20.0-24.1) |          |                   |
| Pretreatment dietary Intake       | general diet    | 5(15.2)          | 6(10.5)          | -        | 0.29 <sup>a</sup> |
|                                   | soft diet       | 16(48.5)         | 23(40.4)         |          |                   |
|                                   | fluid diet      | 11(33.3)         | 28(49.1)         |          |                   |
|                                   | aphagosis       | 1(3.0)           | 0(0.0)           |          |                   |
| Tobacco consumption               | no              | 19(57.6)         | 34(59.6)         | 0.04     | 0.85              |
|                                   | yes             | 14(42.4)         | 23(40.4)         |          |                   |
| Alcohol consumption               | no              | 21(63.6)         | 50(87.7)         | 7.28     | 0.008             |
|                                   | yes             | 12(36.4)         | 7(12.3)          |          |                   |
| Tumor location                    | upper third     | 10(30.3)         | 21(36.8)         | 0.95     | 0.62              |
|                                   | middle third    | 15(45.5)         | 20(35.1)         |          |                   |
|                                   | lower third     | 8(24.2)          | 16(28.1)         |          |                   |
| Length                            | <5.0cm          | 11(33.3)         | 23(40.4)         | 0.44     | 0.51              |
|                                   | $\geq$ 5.0cm    | 22(66.7)         | 34(59.6)         |          |                   |
|                                   | Median (IQR)    | 5.0 (4.0-7.8)    | 5.0 (4.0-6.0)    |          |                   |
| T stage                           | T1              | 0(0.0)           | 0(0.0)           | -        | 0.07 <sup>a</sup> |
|                                   | T2              | 4(12.1)          | 2(3.5)           |          |                   |
|                                   | T3              | 19(57.6)         | 45(78.9)         |          |                   |
|                                   | T4              | 10(30.3)         | 10(17.5)         |          |                   |
| N stage                           | N0              | 12(36.4)         | 23(40.4)         | 0.14     | 0.71              |
|                                   | N1              | 21(63.6)         | 34(59.6)         |          |                   |
| M stage                           | M0              | 28(84.8)         | 54(94.7)         | -        | 0.16 <sup>a</sup> |

|                         |              |            |          |         |                   |
|-------------------------|--------------|------------|----------|---------|-------------------|
|                         | M1a          | 3(9.1)     | 3(5.3)   |         |                   |
|                         | M1b          | 2(6.1)     | 0(0.0)   |         |                   |
| TNM stage               | IIA          | 7(21.2)    | 20(35.1) |         |                   |
|                         | IIB          | 3(9.1)     | 1(1.8)   |         |                   |
|                         | III          | 18(54.5)   | 33(57.9) | -       | 0.09 <sup>a</sup> |
|                         | IVA          | 3(9.1)     | 3(5.3)   |         |                   |
|                         | IVB          | 2(6.1)     | 0(0.0)   |         |                   |
|                         | Radiotherapy | incomplete | 5(15.2)  | 6(10.5) | -                 |
|                         | completed    | 28(84.8)   | 51(89.5) |         |                   |
| Concurrent chemotherapy | incomplete   | -          | 16(28.1) | -       | -                 |
|                         | completed    | -          | 41(71.9) |         |                   |
| Adjuvant chemotherapy   | incomplete   | -          | 22(38.6) | -       | -                 |
|                         | completed    | -          | 35(61.4) |         |                   |

<sup>a</sup>confirmed by Fisher's exact test.

**eTable 5.** Incidence of Severe Adverse Events (Grade 3-5)

| Adverse events   | RT               | CRT+CT           | $\chi^2$ | <i>P</i> value    |
|------------------|------------------|------------------|----------|-------------------|
|                  | ( <i>N</i> =142) | ( <i>N</i> =176) |          |                   |
| Anemia           | 1(0.7%)          | 2(1.1%)          | -        | 1.00 <sup>a</sup> |
| Leukopenia       | 8(5.6%)          | 15(8.5%)         | 0.98     | 0.32              |
| Neutropenia      | 5(3.5%)          | 9(5.1%)          | 0.47     | 0.49              |
| Thrombocytopenia | 0(0.0%)          | 2(1.1%)          | -        | 0.50 <sup>a</sup> |
| Nausea           | 5(3.5%)          | 15(8.5%)         | 3.34     | 0.07              |
| Vomiting         | 1(0.7%)          | 6(3.4%)          | -        | 0.14 <sup>a</sup> |
| Fatigue          | 1(0.7%)          | 5(2.8%)          | -        | 0.23 <sup>a</sup> |
| Diarrhea         | 0(0.0%)          | 1(0.6%)          | -        | 1.00 <sup>a</sup> |
| Esophagitis      | 8(5.6%)          | 21(11.9%)        | 3.76     | 0.05              |
| Pneumonitis      | 6(4.2%)          | 9(5.1%)          | 0.14     | 0.71              |
| Fever            | 0(0.0%)          | 4(2.3%)          | -        | 0.13 <sup>a</sup> |
| Weight loss      | 1(0.7%)          | 1(0.6%)          | -        | 1.00 <sup>a</sup> |
| Transaminitis    | 0(0.0%)          | 2(1.1%)          | -        | 0.50 <sup>a</sup> |

<sup>a</sup>confirmed by Fisher's exact test.

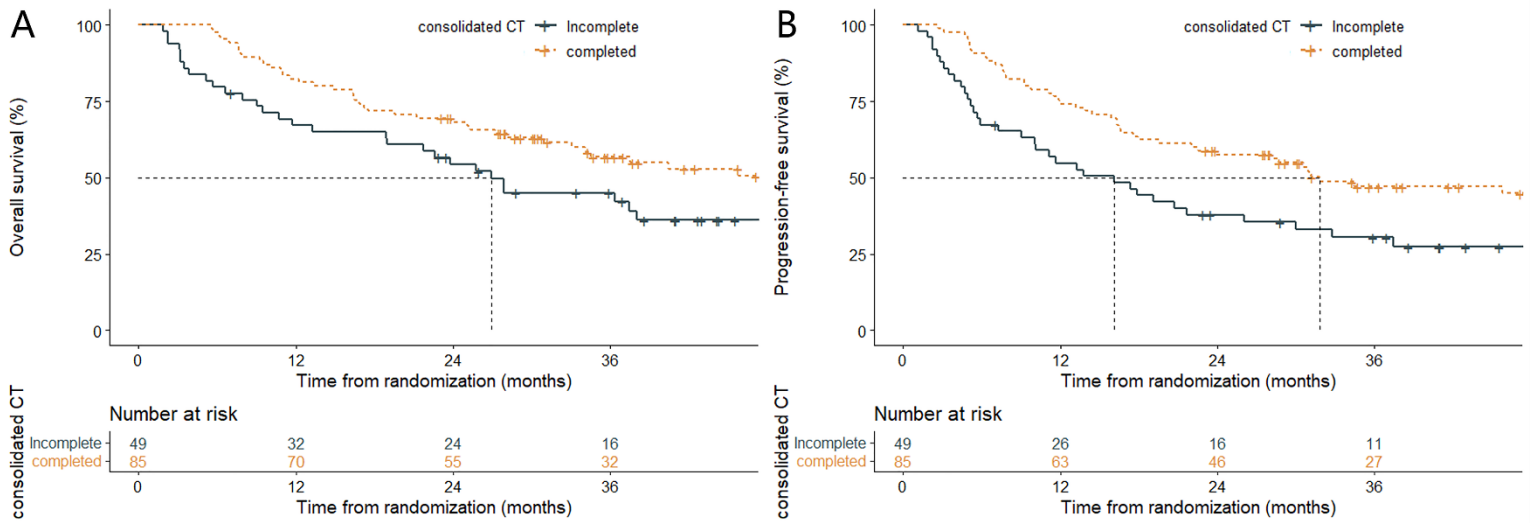

**eFigure.** Overall Survival and Progression-Free Survival of Patients Who Completed Concurrent Chemotherapy With or Without Consolidated Chemotherapy

A. Overall survival of patients completed concurrent chemotherapy with/ without consolidated chemotherapy (Hazard ratio=0.61, 95% CI: 0.35-0.98, Log-Rank P value=0.04).

B. Progression-free survival of patients completed concurrent chemotherapy with/ without consolidated chemotherapy (Hazard ratio=0.55, 95% CI: 0.35-0.86, Log-Rank P value=0.008).
