# Supplementary material for: Effectiveness of S-1–Based Chemoradiotherapy in Patients 70 Years and Older With Esophageal Squamous Cell Carcinoma: A Randomized Clinical Trial
Source: PubMed Central journal article supplement (PMC10193185; doi:10.1001/jamanetworkopen.2023.12625), 2023-05-17
Supplement: jamanetwopen-e2312625-s003.pdf [file jamanetwopen-e2312625-s003.pdf]

\*First name, last name, and suffix (if applicable) are required and will appear in PubMed.

| <b>*Group Name(s): Jing-Jin-Ji Esophageal and Esophagogastric Cancer Radiotherapy Oncology Group (3JECROG)</b> |                   |                              |                         |                                                                                                                                         |                                                 |                                                                |                                                                                                   |
|----------------------------------------------------------------------------------------------------------------|-------------------|------------------------------|-------------------------|-----------------------------------------------------------------------------------------------------------------------------------------|-------------------------------------------------|----------------------------------------------------------------|---------------------------------------------------------------------------------------------------|
| <b>*First Name and Middle Initial(s)</b>                                                                       | <b>*Last Name</b> | <b>*Suffix (eg, Jr, III)</b> | <b>Academic Degrees</b> | <b>Institution</b>                                                                                                                      | <b>Location (city, state/province, country)</b> | <b>Role or Contribution, eg, chair, principal investigator</b> | <b>Group (if more than 1 Group listed in the byline) and/or Subgroup (eg, Steering Committee)</b> |
| Yuanji                                                                                                         | Xu                |                              | M.D.                    | Department of Radiation Oncology, Clinical Oncology School of Fujian Medical University, Fujian Cancer Hosptial                         | Fuzhou, China                                   | Research Coordinator                                           |                                                                                                   |
| Haoying                                                                                                        | Wang              |                              | M.D.                    | Department of Radiation Oncology, Anyang Cancer Hospital                                                                                | Anyang, China                                   | Research Coordinator                                           |                                                                                                   |
| Tian                                                                                                           | Zhang             |                              | M.D.                    | Department of Radiation Oncology, Tianjin Medical University Cancer Institute and Hospital/National Clinical Research Center for Cancer | Tianjin, China                                  | Research Coordinator                                           |                                                                                                   |
| Xi                                                                                                             | Chen              |                              | M.D.                    | Department of Radiation Oncology, Tianjin Medical University Cancer Institute and Hospital/National Clinical Research Center for Cancer | Tianjin, China                                  | Research Coordinator                                           |                                                                                                   |
| Xiaojie                                                                                                        | Xia               |                              | M.D.                    | Department of Radiation Oncology, Nanjing Medical University First Affiliated Hospital                                                  | Nanjing, China                                  | Research Coordinator                                           |                                                                                                   |
| Zhigang                                                                                                        | Zhang             |                              | M.D.                    | Department of Radiation Oncology, the First Affiliated Hospital of Zhengzhou University                                                 | Zhengzhou, China                                | Research Coordinator                                           |                                                                                                   |
| Fen                                                                                                            | Zhang             |                              | M.D.                    | Department of Oncology, Tengzhou Central People's Hospital                                                                              | Tengzhou, China                                 | Research Coordinator                                           |                                                                                                   |
| Xiaojing                                                                                                       | Sun               |                              | M.D.                    | Department of Radiation Oncology, Affiliated Hospital of Hebei University                                                               | Baoding, China                                  | Research Coordinator                                           |                                                                                                   |

## Supplemental Online Content: Nonauthor Collaborators

\*First name, last name, and suffix (if applicable) are required and will appear in PubMed.

| *First Name and Middle Initial(s) | *Last Name | *Suffix (eg, Jr, III) | Academic Degrees | Institution                                                                                    | Location (city, state/province, country) | Role or Contribution, eg, chair, principal investigator | Group (if more than 1 Group listed in the byline) and/or Subgroup (eg, Steering Committee) |
|-----------------------------------|------------|-----------------------|------------------|------------------------------------------------------------------------------------------------|------------------------------------------|---------------------------------------------------------|--------------------------------------------------------------------------------------------|
| Fei                               | Teng       |                       | M.D.             | Department of Radiation Oncology, Affiliated Hospital of Hebei University                      | Baoding, China                           | Research Coordinator                                    |                                                                                            |
| Yu                                | Lin        |                       | M.D.             | Department of Radiation Oncology, The Affiliated Hospital of Inner Mongolia Medical University | Hohhot, China                            | Research Coordinator                                    |                                                                                            |
| Shufeng                           | Zhang      |                       | M.D.             | Department of Radiation Oncology, The Affiliated Hospital of Inner Mongolia Medical University | Hohhot, China                            | Research Coordinator                                    |                                                                                            |
