# Supplementary material for: Effectiveness of S-1–Based Chemoradiotherapy in Patients 70 Years and Older With Esophageal Squamous Cell Carcinoma: A Randomized Clinical Trial
Source: PubMed Central journal article supplement (PMC10193185; doi:10.1001/jamanetworkopen.2023.12625), 2023-05-17
Supplement: jamanetwopen-e2312625-s004.pdf [file jamanetwopen-e2312625-s004.pdf]

## Data Sharing Statement

Wang. Effectiveness of S-1–Based Chemoradiotherapy in Patients 70 Years and Older With Esophageal Squamous Cell Carcinoma. *JAMA Netw Open*. Published May 17, 2023.  
doi:10.1001/jamanetworkopen.2023.12625

### Data

**Data available:** Yes

**Data types:** Deidentified participant data

**How to access data:** All pertinent data to support this study and additional, related documents are included in the paper and further data are available via the corresponding author (Zefen Xiao, [xiaozefen@sina.com](mailto:xiaozefen@sina.com)) after approval of a proposal, with a signed data access agreement.

**When available:** With publication

### Supporting Documents

**Document types:** Statistical/analytic code

**How to access documents:** All pertinent data to support this study and additional, related documents are included in the paper and further data are available via the corresponding author (Zefen Xiao, [xiaozefen@sina.com](mailto:xiaozefen@sina.com)) after approval of a proposal, with a signed data access agreement.

**When available:** With publication

### Additional Information

**Who can access the data:** researchers whose proposed use of the data has been approved

**Types of analyses:** for study purpose

**Mechanisms of data availability:** after approval of a proposal
